# Supplementary material for: Endophytic Bacteria and Essential Oil from Origanum vulgare ssp. vulgare Share Some VOCs with an Antibacterial Activity
Source: MDPI journal article supplement (doi:10.3390/microorganisms10071424), 2022-07-14
Supplement: s1 [file s1]

# Supplementary Material

## Endophytic bacteria and essential oil from *Origanum vulgare* ssp. *vulgare* share some VOCs with an antibacterial activity

Giulia Polito<sup>1†</sup>, Giulia Semenzato<sup>2†</sup>, Sara Del Duca<sup>2</sup>, Lara Mitia Castronovo<sup>2</sup>, Alberto Vassallo<sup>2</sup>, Sofia Chioccioli<sup>2</sup>, Duccio Borsetti<sup>2</sup>, Vittoria Calabretta<sup>2</sup>, Anna Maria Puglia<sup>1</sup>, Renato Fani<sup>2</sup> and Antonio Palumbo Piccionello<sup>1,\*</sup>

<sup>1</sup>Department of Biological, Chemical and Pharmaceutical Sciences and Technologies-STEBICEF, University of Palermo, Viale delle Scienze Ed.17, 90128, Palermo, Italy; giulia.polito@unipa.it, a.maria.puglia@unipa.it

<sup>2</sup>Department of Biology, University of Florence, Via Madonna del Piano 6, Sesto Fiorentino, 50019 Florence, Italy; giulia.semenzato@unifi.it, sara.delduca@unifi.it, l.castronovo@student.unisi.it; alberto.vassallo@unicam.it; sofia.chioccioli@unifi.it; duccio.borsetti@stud.unifi.it; vittoria.calabretta@stud.unifi.it; renato.fani@unifi.it

\*Correspondence: antonio.palumbopiccionello@unipa.it; Tel.: +3909123897544

†Authors equally contributed to this work.

**Table S1.** Number of colony forming units (CFU) of each target strain obtained at the beginning ( $t_0$ ) and at the end ( $t_1$ ) of the cross-streaking experiments in the absence (C+) or in the presence (*vs* TESTER) of the endophytic strains.

|          | $t_0$             | $t_1$ <i>vs</i> OVS8  | C+                | $t_1$ compared to C+ (%) |
|----------|-------------------|-----------------------|-------------------|--------------------------|
| FCF3     | $5.9 \times 10^3$ | $7.2 \times 10^4$     | $5.0 \times 10^8$ | 0.0144                   |
| FCF23    | $1.6 \times 10^3$ | $<10^2$               | $9.0 \times 10^5$ | 0.0110                   |
| LMG13010 | $3.0 \times 10^3$ | $4.3 \times 10^5$     | $2.7 \times 10^8$ | 0.1593                   |
| LMG16656 | $8.5 \times 10^3$ | $<10^2$               | $4.8 \times 10^7$ | 0.0002                   |
| LMG21462 | $2.0 \times 10^3$ | $<10^2$               | $1.1 \times 10^8$ | 0.0001                   |
| LMG24506 | $1.3 \times 10^4$ | $<10^2$               | $1.1 \times 10^8$ | 0.0001                   |
| LMG1222  | $2.9 \times 10^3$ | $5.7 \times 10^4$     | $7.5 \times 10^6$ | 0.7600                   |
| LMG17588 | $3.0 \times 10^3$ | $6.3 \times 10^2$     | $6.6 \times 10^6$ | 0.0095                   |
| LMG19182 | $7.6 \times 10^3$ | $<10^2$               | $8.0 \times 10^5$ | 0.0124                   |
| LMG19230 | $2.7 \times 10^3$ | $5.1 \times 10^5$     | $6.7 \times 10^7$ | 0.7612                   |
|          |                   |                       | <b>Mean</b>       | <b>0.1728</b>            |
|          | $t_0$             | $t_1$ <i>vs</i> OVF10 | C+                | $t_1$ compared to C+ (%) |
| FCF3     | $5.9 \times 10^3$ | $2.0 \times 10^8$     | $5.0 \times 10^8$ | 40.0000                  |
| FCF23    | $1.6 \times 10^3$ | $5.6 \times 10^7$     | $9.0 \times 10^5$ | 6222.2222                |
| LMG13010 | $3.0 \times 10^3$ | $1.4 \times 10^8$     | $2.7 \times 10^8$ | 51.8519                  |
| LMG16656 | $8.5 \times 10^3$ | $2.7 \times 10^6$     | $4.8 \times 10^7$ | 5.6250                   |
| LMG21462 | $2.0 \times 10^3$ | $3.9 \times 10^5$     | $1.1 \times 10^8$ | 0.3545                   |
| LMG24506 | $1.3 \times 10^4$ | $1.7 \times 10^9$     | $1.1 \times 10^8$ | 1545.4545                |
| LMG1222  | $2.9 \times 10^3$ | $3.8 \times 10^8$     | $7.5 \times 10^6$ | 5066.6667                |
| LMG17588 | $3.0 \times 10^3$ | $1.1 \times 10^8$     | $6.6 \times 10^6$ | 1666.6667                |
| LMG19182 | $7.6 \times 10^3$ | $2.4 \times 10^6$     | $8.0 \times 10^5$ | 300.0000                 |
| LMG19230 | $2.7 \times 10^3$ | $1.7 \times 10^7$     | $6.7 \times 10^7$ | 25.3731                  |

|          |                   |                       |                   |                          |
|----------|-------------------|-----------------------|-------------------|--------------------------|
|          |                   |                       | <b>Mean</b>       | <b>1492.4215</b>         |
|          | $t_0$             | $t_1$ vs <b>OVS6</b>  | <b>C+</b>         | $t_1$ compared to C+ (%) |
| FCF3     | $5.9 \times 10^3$ | $2.8 \times 10^5$     | $5.0 \times 10^8$ | 0.0560                   |
| FCF23    | $1.6 \times 10^3$ | $1.5 \times 10^4$     | $9.0 \times 10^5$ | 1.6667                   |
| LMG13010 | $3.0 \times 10^3$ | $1.1 \times 10^8$     | $2.7 \times 10^8$ | 40.7407                  |
| LMG16656 | $8.5 \times 10^3$ | $1.8 \times 10^5$     | $4.8 \times 10^7$ | 0.3750                   |
| LMG21462 | $2.0 \times 10^3$ | $3.3 \times 10^2$     | $1.1 \times 10^8$ | 0.0003                   |
| LMG24506 | $1.3 \times 10^4$ | $8.8 \times 10^4$     | $1.1 \times 10^8$ | 0.0800                   |
| LMG1222  | $2.9 \times 10^3$ | $1.1 \times 10^6$     | $7.5 \times 10^6$ | 14.6667                  |
| LMG17588 | $3.0 \times 10^3$ | $6.7 \times 10^6$     | $6.6 \times 10^6$ | 101.5152                 |
| LMG19182 | $7.6 \times 10^3$ | $8.4 \times 10^2$     | $8.0 \times 10^5$ | 0.1050                   |
| LMG19230 | $2.7 \times 10^3$ | $5.3 \times 10^7$     | $6.7 \times 10^7$ | 79.1045                  |
|          |                   |                       | <b>Mean</b>       | <b>23.8310</b>           |
|          | $t_0$             | $t_1$ vs <b>OVL24</b> | <b>C+</b>         | $t_1$ compared to C+ (%) |
| FCF3     | $5.9 \times 10^3$ | $8.7 \times 10^5$     | $5.0 \times 10^8$ | 0.1740                   |
| FCF23    | $1.6 \times 10^3$ | $3.8 \times 10^5$     | $9.0 \times 10^5$ | 42.2222                  |
| LMG13010 | $3.0 \times 10^3$ | $2.4 \times 10^7$     | $2.7 \times 10^8$ | 8.8889                   |
| LMG16656 | $8.5 \times 10^3$ | N.D.                  | $4.8 \times 10^7$ | N.D.                     |
| LMG21462 | $2.0 \times 10^3$ | $7.0 \times 10^2$     | $1.1 \times 10^8$ | 0.0006                   |
| LMG24506 | $1.3 \times 10^4$ | $1.1 \times 10^6$     | $1.1 \times 10^8$ | 1.0000                   |
| LMG1222  | $2.9 \times 10^3$ | $2.0 \times 10^6$     | $7.5 \times 10^6$ | 26.6667                  |
| LMG17588 | $3.0 \times 10^3$ | $3.3 \times 10^7$     | $6.6 \times 10^6$ | 500.0000                 |
| LMG19182 | $7.6 \times 10^3$ | $9.2 \times 10^4$     | $8.0 \times 10^5$ | 11.5000                  |
| LMG19230 | $2.7 \times 10^3$ | $1.0 \times 10^8$     | $6.7 \times 10^7$ | 149.2537                 |
|          |                   |                       | <b>Mean</b>       | <b>82.1896</b>           |
|          | $t_0$             | $t_1$ vs <b>OVL9</b>  | <b>C+</b>         | $t_1$ compared to C+ (%) |
| FCF3     | $2.8 \times 10^3$ | $1.5 \times 10^4$     | $7.7 \times 10^7$ | 0.0195                   |
| FCF23    | $2.3 \times 10^2$ | $9.2 \times 10^4$     | $4.2 \times 10^6$ | 2.1905                   |
| LMG13010 | $1.9 \times 10^3$ | $3.5 \times 10^6$     | $1.8 \times 10^8$ | 1.9444                   |
| LMG16656 | $3.5 \times 10^2$ | $<10^3$               | $8.2 \times 10^7$ | 0.0012                   |
| LMG21462 | $1.9 \times 10^3$ | $<10^3$               | $6.4 \times 10^7$ | 0.0016                   |
| LMG24506 | $7.7 \times 10^3$ | $1.4 \times 10^3$     | $1.4 \times 10^8$ | 0.0010                   |
| LMG1222  | $7.9 \times 10^2$ | $<10^5$               | $7.4 \times 10^7$ | 0.1351                   |
| LMG17588 | $7.6 \times 10^2$ | $2.2 \times 10^5$     | $1.3 \times 10^7$ | 1.6923                   |
| LMG19182 | $1.6 \times 10^3$ | $1.1 \times 10^6$     | $<10^6$           | 110.0001                 |
| LMG19230 | $4.0 \times 10^2$ | $2.1 \times 10^7$     | $2.6 \times 10^7$ | 80.7692                  |
|          |                   |                       | <b>Mean</b>       | <b>19.6755</b>           |
|          | $t_0$             | $t_1$ vs <b>OVS21</b> | <b>C+</b>         | $t_1$ compared to C+ (%) |
| FCF3     | $2.8 \times 10^3$ | N.D.                  | $7.7 \times 10^7$ | N.D.                     |
| FCF23    | $2.3 \times 10^2$ | $6.8 \times 10^4$     | $4.2 \times 10^6$ | 1.6190                   |
| LMG13010 | $1.9 \times 10^3$ | $5.2 \times 10^6$     | $1.8 \times 10^8$ | 2.8889                   |
| LMG16656 | $3.5 \times 10^2$ | $2.1 \times 10^5$     | $8.2 \times 10^7$ | 0.2561                   |
| LMG21462 | $1.9 \times 10^3$ | $<10^3$               | $6.4 \times 10^7$ | 0.0016                   |
| LMG24506 | $7.7 \times 10^3$ | $5.6 \times 10^3$     | $1.4 \times 10^8$ | 0.0040                   |
| LMG1222  | $7.9 \times 10^2$ | $3.9 \times 10^7$     | $7.4 \times 10^7$ | 52.7027                  |
| LMG17588 | $7.6 \times 10^2$ | $1.2 \times 10^7$     | $1.3 \times 10^7$ | 92.3077                  |
| LMG19182 | $1.6 \times 10^3$ | $5.2 \times 10^5$     | $<10^6$           | 52.0001                  |
| LMG19230 | $4.0 \times 10^2$ | $2.0 \times 10^7$     | $2.6 \times 10^7$ | 76.9231                  |
|          |                   |                       | <b>Mean</b>       | <b>30.9670</b>           |
|          | $t_0$             | $t_1$ vs <b>OVF22</b> | <b>C+</b>         | $t_1$ compared to C+ (%) |
| FCF3     | $2.8 \times 10^3$ | $7.5 \times 10^4$     | $7.7 \times 10^7$ | 0.0974                   |
| FCF23    | $2.3 \times 10^2$ | $4.8 \times 10^3$     | $4.2 \times 10^6$ | 0.1143                   |

|          |                   |                       |                   |                          |
|----------|-------------------|-----------------------|-------------------|--------------------------|
| LMG13010 | $1.9 \times 10^3$ | $2.9 \times 10^5$     | $1.8 \times 10^8$ | 0.1611                   |
| LMG16656 | $3.5 \times 10^2$ | $<10^3$               | $8.2 \times 10^7$ | 0.0012                   |
| LMG21462 | $1.9 \times 10^3$ | $<10^3$               | $6.4 \times 10^7$ | 0.0016                   |
| LMG24506 | $7.7 \times 10^3$ | $<10^3$               | $1.4 \times 10^8$ | 0.0007                   |
| LMG1222  | $7.9 \times 10^2$ | $2.4 \times 10^7$     | $7.4 \times 10^7$ | 32.4324                  |
| LMG17588 | $7.6 \times 10^2$ | $3.6 \times 10^4$     | $1.3 \times 10^7$ | 0.2769                   |
| LMG19182 | $1.6 \times 10^3$ | $2.0 \times 10^5$     | $<10^6$           | 20.0000                  |
| LMG19230 | $4.0 \times 10^2$ | $1.6 \times 10^6$     | $2.6 \times 10^7$ | 6.1538                   |
|          |                   |                       | <b>Mean</b>       | <b>5.9235</b>            |
|          | $t_0$             | $t_1$ vs <b>OVS26</b> | <b>C+</b>         | $t_1$ compared to C+ (%) |
| FCF3     | $2.8 \times 10^3$ | $1.3 \times 10^4$     | $7.7 \times 10^7$ | 0.0169                   |
| FCF23    | $2.3 \times 10^2$ | $1.4 \times 10^3$     | $4.2 \times 10^6$ | 0.0333                   |
| LMG13010 | $1.9 \times 10^3$ | $6.6 \times 10^5$     | $1.8 \times 10^8$ | 0.3667                   |
| LMG16656 | $3.5 \times 10^2$ | $1.3 \times 10^3$     | $8.2 \times 10^7$ | 0.0016                   |
| LMG21462 | $1.9 \times 10^3$ | $<10^3$               | $6.4 \times 10^7$ | 0.0016                   |
| LMG24506 | $7.7 \times 10^3$ | $<10^3$               | $1.4 \times 10^8$ | 0.0007                   |
| LMG1222  | $7.9 \times 10^2$ | $1.4 \times 10^4$     | $7.4 \times 10^7$ | 0.0189                   |
| LMG17588 | $7.6 \times 10^2$ | $3.0 \times 10^3$     | $1.3 \times 10^7$ | 0.0231                   |
| LMG19182 | $1.6 \times 10^3$ | $1.4 \times 10^5$     | $<10^6$           | 14.0000                  |
| LMG19230 | $4.0 \times 10^2$ | $7.0 \times 10^6$     | $2.6 \times 10^7$ | 26.9231                  |
|          |                   |                       | <b>Mean</b>       | <b>4.1386</b>            |
